# Supplementary material for: Thermo-stable hollow magnetic microspheres: preparation, characterization and recyclable catalytic applications
Source: Royal Society of Chemistry journal article supplement (doi:10.1039/c5ta03553h), 2015-01-01
Supplement: c5ta03553h1.pdf [file c5ta03553h1.pdf]

### Supporting information

#### Thermo-stable hollow magnetic microspheres: Preparation, characterisation and recyclable catalytic applications

Jingwen Ma,<sup>†a</sup> Youshen Wu,<sup>†a</sup> Yun Zeng<sup>a</sup>, Yan Li<sup>a</sup>, Daocheng Wu<sup>\*a</sup>

Key Laboratory of Biomedical Information Engineering of the Ministry of Education, School of Life Science and Technology, Xi'an Jiaotong University, Xi'an, 710049, P. R. China. E-mail: wudaocheng@mail.xjtu.edu.cn; Tel: +86 2982663941

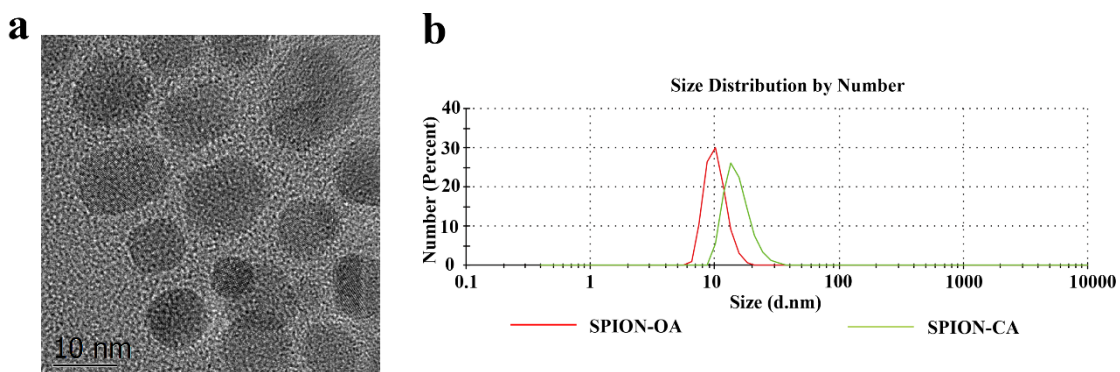

Fig. S1 TEM images of SPION and its size distribution of SPION-OA and SPION-CA

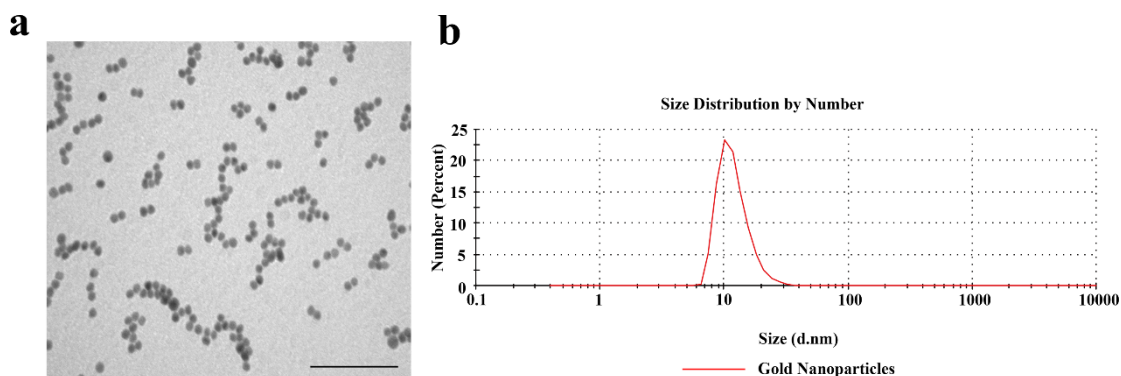

Fig. S2 TEM images of Au NPs and its size distribution

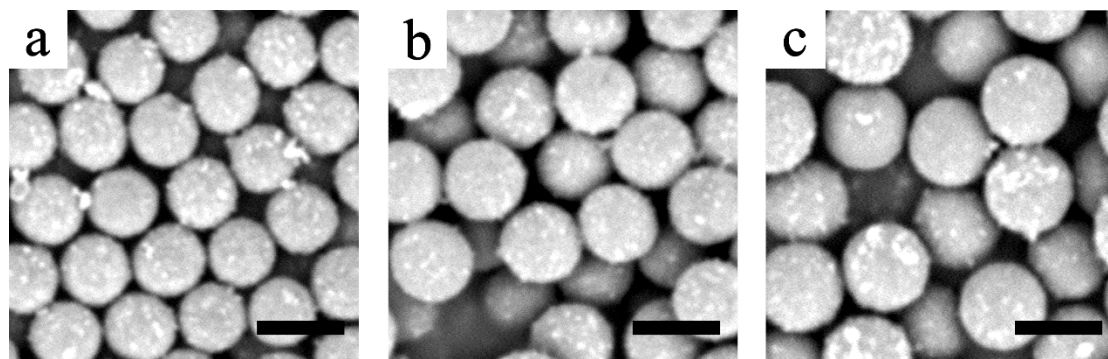

Fig.S3 SEM images of MF(1.5)@SiO<sub>2</sub>, MF(1.8)@SiO<sub>2</sub>, MF(2.0)@SiO<sub>2</sub>

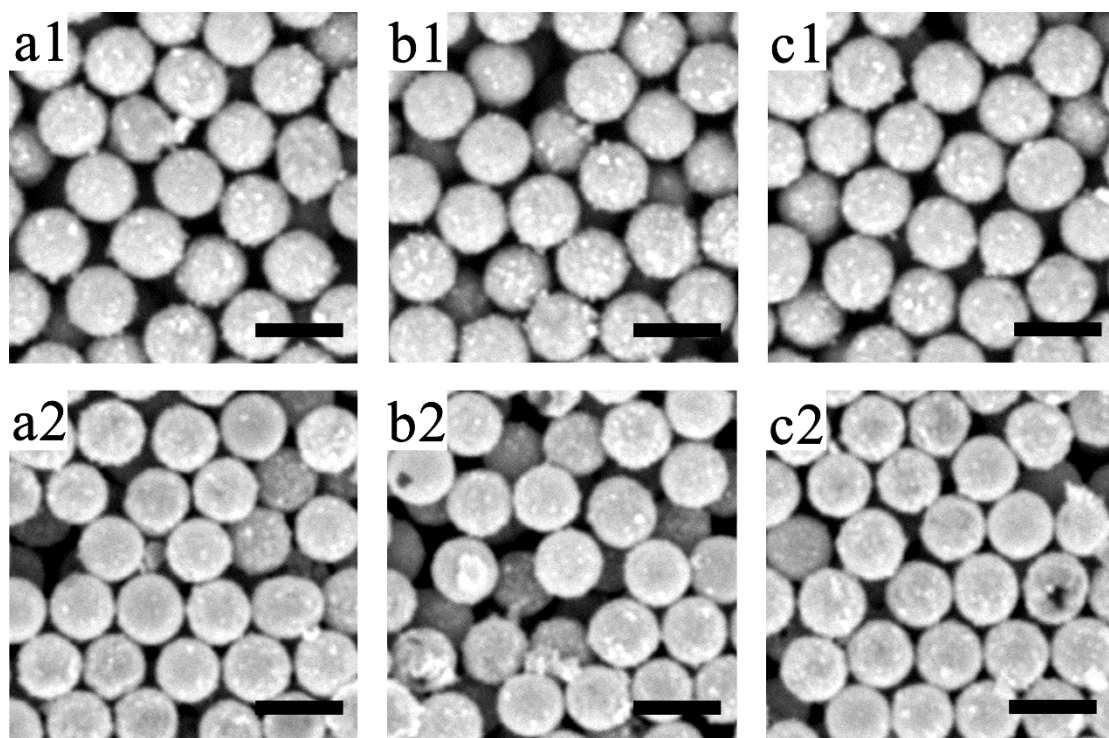

Fig.S4 SEM images of MS(1.5)-1 (a1) , MS(1.5)-2 (b1) and MS(1.5)-5 (c1) and CS(1.5)-1 (a2), CS(1.5)-2 (b2) and CS(1.5)-5 (c2). Scale bar in each image = 2  $\mu$ m.

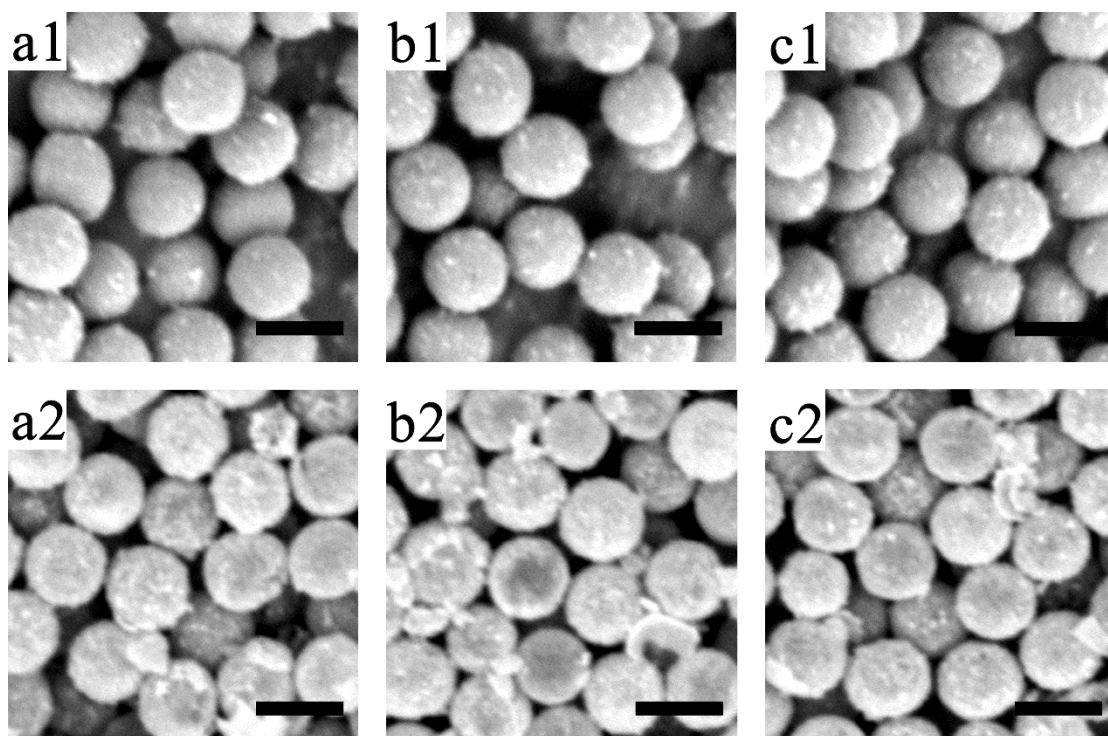

Fig.S5 SEM images of MS(1.8)-1 (a1) , MS(1.8)-2 (b1) and MS(1.8)-5 (c1) and CS(1.8)-1 (a2), CS(1.8)-2 (b2) and CS(1.8)-5 (c2). Scale bar in each image = 2  $\mu$ m.

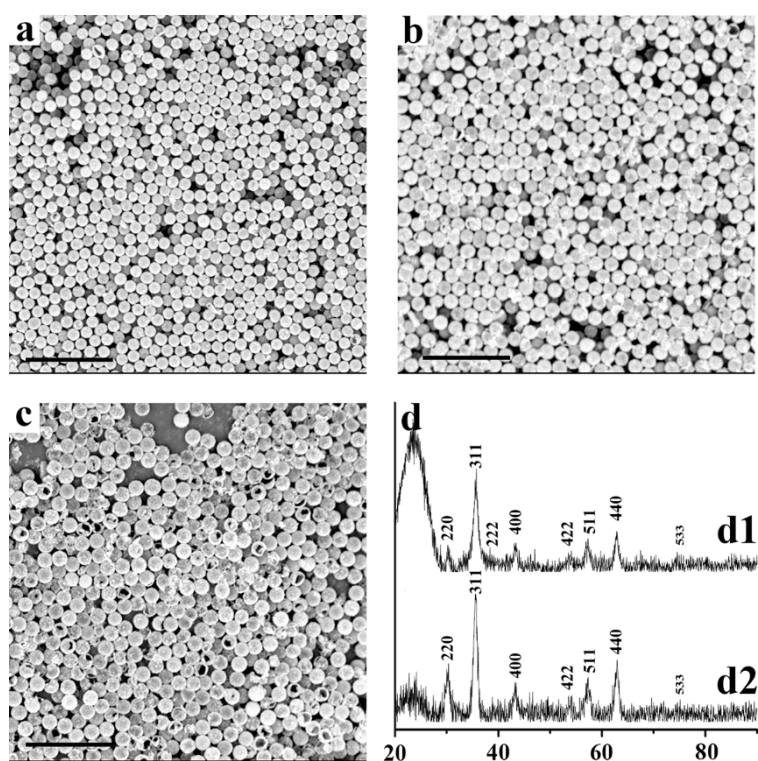

Fig. S6 SEM images of CS(1.5)-5 in (a), CS(1.8)-5 in (b) and CS(2.0)-5 in (c). The XRD patterns of MS(2.0)-5 (line d1) and CS(2.0)-5 (line d2) in (d). Scale bar in (a), (b) and (c) is 10  $\mu\text{m}$ .

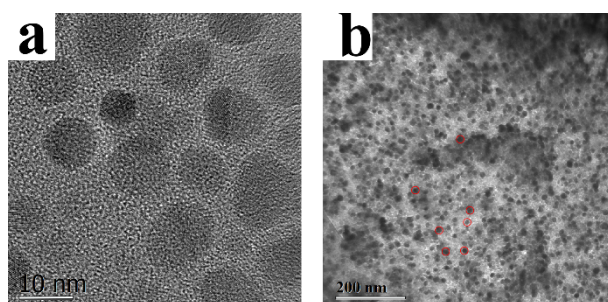

Fig. S7 TEM images of magnetic nanoparticles (a); TEM images of part of microspheres after assembly (b) and magnetic nanoparticles after assembly are signed by red circles.

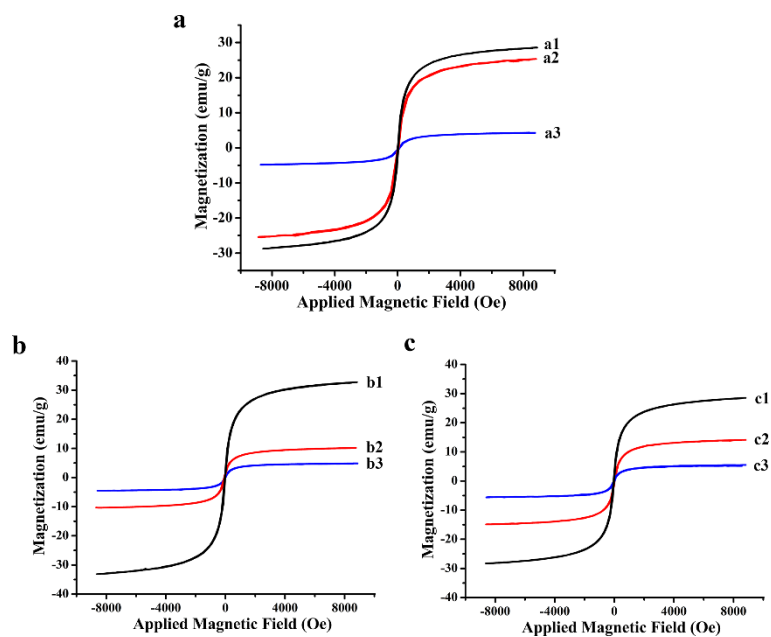

Fig.S8 Magnetic hysteresis loop of CS(2.0)-5 calcined for second time (a1), CS(2.0)-5 (a2) and MS(2.0)-5 (a3) in (a). Magnetic hysteresis loop of CS(1.5)-5 (b1), CS(1.5)-2 (b2) and CS(1.5)-1 (b3) in (b). Magnetic hysteresis loop of CS(1.8)-5 (c1), CS(1.8)-2 (c2) and CS(1.8)-1 (c3) in (c).

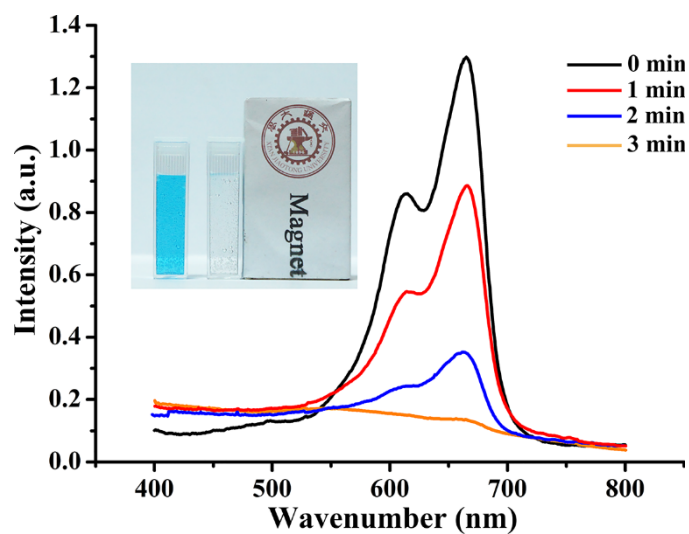

Fig.S9 The UV-vis spectrum of MB solution with 1 mL of NaBH<sub>4</sub> mixture in the presence of 25  $\mu$ L of 1  $\text{mg}\cdot\text{mL}^{-1}$  of CS(2.0)-5 at different time. The insert shows the photos of reactive system before and after catalysis with a magnet to separate the catalyst.
